# Supplementary material for: Synthesis, crystal structure, cytotoxicity and action mechanism of Zn(ii) and Mn(ii) complexes with 4-([2,2′:6′,2′′-terpyridin]-4′-yl)-N,N-diethylaniline as a ligand
Source: Royal Society of Chemistry journal article supplement (doi:10.1039/c6md00098c), 2016-01-01
Supplement: c6md00098c1.pdf [file c6md00098c1.pdf]

## Electronic Supporting Information Materials

### Synthesis, crystal structure, cytotoxicity and action mechanism of Zn(II) and Mn(II) complexes with 4-([2,2':6',2''-terpyridin]-4'-yl)-N,N-diethylaniline as a ligand

Hua-Hong Zou,<sup>\*a</sup> Jun-Guang Wei,<sup>a</sup> Xiao-Huan Qin,<sup>a</sup> Shun-Gui Mo,<sup>a</sup> Qi-Pin Qin,<sup>\*a</sup> Yan-Cheng Liu,<sup>a</sup> Fu-Pei Liang,<sup>\*ab</sup> Yun-Liang Zhang<sup>ac</sup> and Zhen-Feng Chen<sup>\*a</sup>

**Table S1.** Crystal data and structure refinement details for **1** and **2**.

|                                                              |                                                                                 |                                                                              |
|--------------------------------------------------------------|---------------------------------------------------------------------------------|------------------------------------------------------------------------------|
| Empirical formula                                            | C <sub>50</sub> H <sub>48</sub> Cl <sub>2</sub> MnN <sub>8</sub> O <sub>8</sub> | C <sub>25</sub> H <sub>24</sub> N <sub>6</sub> O <sub>6</sub> Zn             |
| Formula weight                                               | 1014.83                                                                         | 569.90                                                                       |
| Temperature/K                                                | 296.15                                                                          | 296.15                                                                       |
| Crystal system                                               | monoclinic                                                                      | monoclinic                                                                   |
| Space group                                                  | <i>P</i> 2 <sub>1</sub> / <i>c</i>                                              | <i>C</i> 2/ <i>c</i>                                                         |
| <i>a</i> / Å                                                 | 19.0394(4)                                                                      | 11.9747(9)                                                                   |
| <i>b</i> / Å                                                 | 15.1400(4)                                                                      | 15.8152(6)                                                                   |
| <i>c</i> / Å                                                 | 17.3328(5)                                                                      | 14.1457(10)                                                                  |
| $\alpha$ / °                                                 | 90                                                                              | 90                                                                           |
| $\beta$ / °                                                  | 108.185(2)                                                                      | 114.424(9)                                                                   |
| $\gamma$ / °                                                 | 90                                                                              | 90                                                                           |
| <i>V</i> / Å <sup>3</sup>                                    | 4746.7(2)                                                                       | 2439.2(3)                                                                    |
| <i>Z</i>                                                     | 4                                                                               | 4                                                                            |
| $\rho_{\text{calc}}$ g/cm <sup>3</sup>                       | 1.4200                                                                          | 1.5518                                                                       |
| $\mu$ / mm <sup>-1</sup>                                     | 0.455                                                                           | 1.062                                                                        |
| <i>F</i> (000)                                               | 2111.5                                                                          | 1177.8                                                                       |
| Crystal size/mm <sup>3</sup>                                 | 0.22 × 0.2 × 0.18                                                               | 0.22 × 0.2 × 0.18                                                            |
| Radiation                                                    | Mo K $\alpha$ ( $\lambda$ = 0.71073)                                            | Mo K $\alpha$ ( $\lambda$ = 0.71073)                                         |
| 2 $\theta$ range for data collection/°                       | 5.84 to 52.74                                                                   | 6.32 to 52.74                                                                |
| Index ranges                                                 | -25 ≤ <i>h</i> ≤ 23, -20 ≤ <i>k</i> ≤ 20, -22 ≤ <i>l</i> ≤ 23                   | -15 ≤ <i>h</i> ≤ 14, -19 ≤ <i>k</i> ≤ 17, -18 ≤ <i>l</i> ≤ 11                |
| Reflections collected                                        | 24898                                                                           | 3510                                                                         |
| Independent reflections                                      | 9698 [ <i>R</i> <sub>int</sub> = 0.0302, <i>R</i> <sub>sigma</sub> = 0.0407]    | 2103 [ <i>R</i> <sub>int</sub> = 0.0209, <i>R</i> <sub>sigma</sub> = 0.0455] |
| Data/restraints/parameters                                   | 9698/0/625                                                                      | 2103/0/175                                                                   |
| Goodness-of-fit on <i>F</i> <sup>2</sup>                     | 1.080                                                                           | 1.008                                                                        |
| Final <i>R</i> indexes [ <i>I</i> ≥ 2 $\sigma$ ( <i>I</i> )] | <i>R</i> <sub>1</sub> = 0.0672, <i>wR</i> <sub>2</sub> = 0.1939                 | <i>R</i> <sub>1</sub> = 0.0529, <i>wR</i> <sub>2</sub> = 0.1300              |
| Final <i>R</i> indexes [all data]                            | <i>R</i> <sub>1</sub> = 0.0924, <i>wR</i> <sub>2</sub> = 0.2230                 | <i>R</i> <sub>1</sub> = 0.0653, <i>wR</i> <sub>2</sub> = 0.1467              |
| Largest diff. peak/hole / e Å <sup>-3</sup>                  | 1.00/-0.79                                                                      | 0.59/-0.82                                                                   |

<sup>a</sup> *R*<sub>1</sub> =  $\sum ||F_o| - |F_c|| / \sum |F_o|$ ; <sup>b</sup> *wR*<sub>2</sub> =  $[\sum w(F_o^2 - F_c^2)^2 / \sum w(F_o^2)^2]^{1/2}$ .

**Table S2** Selected bond lengths (Å) and bond angles (°) for **1** and **2**.

| Bond lengths (Å) for <b>1</b> |            |                         |            |                        |            |                                      |            |
|-------------------------------|------------|-------------------------|------------|------------------------|------------|--------------------------------------|------------|
| Mn1-N1                        | 2.252(3)   | Mn1-N2                  | 1.334(3)   | Mn1-N3                 | 2.244(3)   | Mn1-N5                               | 2.288(3)   |
| Mn1-N6                        | 2.190(3)   | Mn1-N7                  | 2.238(3)   |                        |            |                                      |            |
| Bond angles (°) for <b>1</b>  |            |                         |            |                        |            |                                      |            |
| N2-Mn1-N1                     | 71.81(10)  | N3-Mn1-N1               | 143.35(10) | N3-Mn1-N2              | 72.55(10)  | N5-Mn1-N1                            | 103.22(12) |
| N5-Mn1-N2                     | 98.80(11)  | N5-Mn1-N3               | 90.37(11)  | N6-Mn1-N1              | 109.98(11) | N6-Mn1-N2                            | 170.61(11) |
| N6-Mn1-N3                     | 106.59(10) | N6-Mn1-N5               | 71.82(10)  | N7-Mn1-N1              | 90.96(12)  | N7-Mn1-N2                            | 116.54(10) |
| N7-Mn1-N3                     | 97.33(12)  | N7-Mn1-N5               | 144.56(10) | N7-Mn1-N6              | 72.83(10)  |                                      |            |
| Bond lengths (Å) for <b>2</b> |            |                         |            |                        |            |                                      |            |
| Zn1-O4                        | 2.012(3)   | Zn1-O4 <sup>1</sup>     | 2.012(3)   | Zn1-N2                 | 2.051(3)   | Zn1-N3                               | 2.151(3)   |
| Zn1-N3 <sup>1</sup>           | 2.151(3)   |                         |            |                        |            |                                      |            |
| Bond angles (°) for <b>2</b>  |            |                         |            |                        |            |                                      |            |
| O4 <sup>1</sup> -Zn1-O4       | 85.59(17)  | N2-Zn1-O4               | 137.20(9)  | N2-Zn1-O4 <sup>1</sup> | 137.20(9)  | N3 <sup>1</sup> -Zn1-O4 <sup>1</sup> | 94.42(11)  |
| N3 <sup>1</sup> -Zn1-O4       | 106.04(11) | N3-Zn1-O4 <sup>1</sup>  | 106.04(11) | N3-Zn1-O4              | 94.42(11)  | N3-Zn1-N2                            | 76.07(7)   |
| N3 <sup>1</sup> -Zn1-N2       | 76.07(7)   | N3 <sup>1</sup> -Zn1-N3 | 152.13(15) | N5-O4-Zn1              | 112.9(2)   |                                      |            |

**Table S3.** Inhibitory rates (%) of **L**, **1**, **2**, the corresponding salts and cisplatin toward four tumor cell lines and normal liver HL-7702 for 48 h.

| Compounds                                                          | BEL-7404   | SK-OV-3    | T-24       | MGC80-3    | HL-7702    |
|--------------------------------------------------------------------|------------|------------|------------|------------|------------|
| <b>L</b> <sup>a</sup>                                              | 37.08±0.87 | 40.14±0.49 | 50.24±1.49 | 58.16±0.52 | 44.05±1.82 |
| <b>1</b> <sup>a</sup>                                              | 55.09±1.23 | 56.97±0.64 | 62.03±1.05 | 60.33±2.15 | 34.18±1.39 |
| <b>2</b> <sup>a</sup>                                              | 72.07±0.80 | 64.11±1.01 | 78.01±0.68 | 64.01±0.94 | 31.52±0.77 |
| Mn(ClO <sub>4</sub> ) <sub>2</sub> ·6H <sub>2</sub> O <sup>b</sup> | 20.11±1.36 | 12.17±0.63 | 22.08±0.64 | 12.73±1.75 | 19.11±0.93 |
| Zn(NO <sub>3</sub> ) <sub>2</sub> ·6H <sub>2</sub> O <sup>b</sup>  | 16.02±0.57 | 16.15±1.98 | 10.89±0.37 | 20.37±2.49 | 15.88±1.56 |
| cisplatin <sup>a</sup>                                             | 58.12±1.13 | 52.09±2.71 | 50.01±1.17 | 57.18±1.35 | 54.61±1.42 |

Results represent mean ± SD of at least five independent experiments. SD represents the standard deviation. <sup>a</sup>The concentration is 20 μM. <sup>b</sup>The concentration is 100 μM.

**Table S4.** IC<sub>50</sub><sup>a</sup> (μM) values of complexes **1** and **2** on the selected cell lines.

|                        | BEL-7404     | SK-OV-3      | T-24         | MGC80-3      | HL-7702      |
|------------------------|--------------|--------------|--------------|--------------|--------------|
| <b>L</b>               | 33.19 ± 1.22 | 20.13 ± 0.43 | 12.53 ± 1.36 | 15.22 ± 0.59 | 30.82 ± 1.75 |
| <b>1</b>               | 14.86 ± 1.29 | 11.53 ± 0.55 | 10.26 ± 1.02 | 12.84 ± 2.07 | 45.02 ± 1.33 |
| <b>2</b>               | 5.29 ± 0.76  | 9.05 ± 1.09  | 1.28 ± 0.61  | 8.59 ± 0.82  | 51.17 ± 0.74 |
| Cisplatin <sup>b</sup> | 15.02 ± 1.08 | 15.17 ± 1.82 | 20.18 ± 1.07 | 13.02 ± 1.13 | 17.68 ± 1.39 |

<sup>a</sup> The IC<sub>50</sub> values are presented as mean ± SD (standard error of the mean) from five independent experiments. <sup>b</sup> The cisplatin stock solution was prepared at a concentration of 1 mM with 0.154 M NaCl.<sup>1</sup>

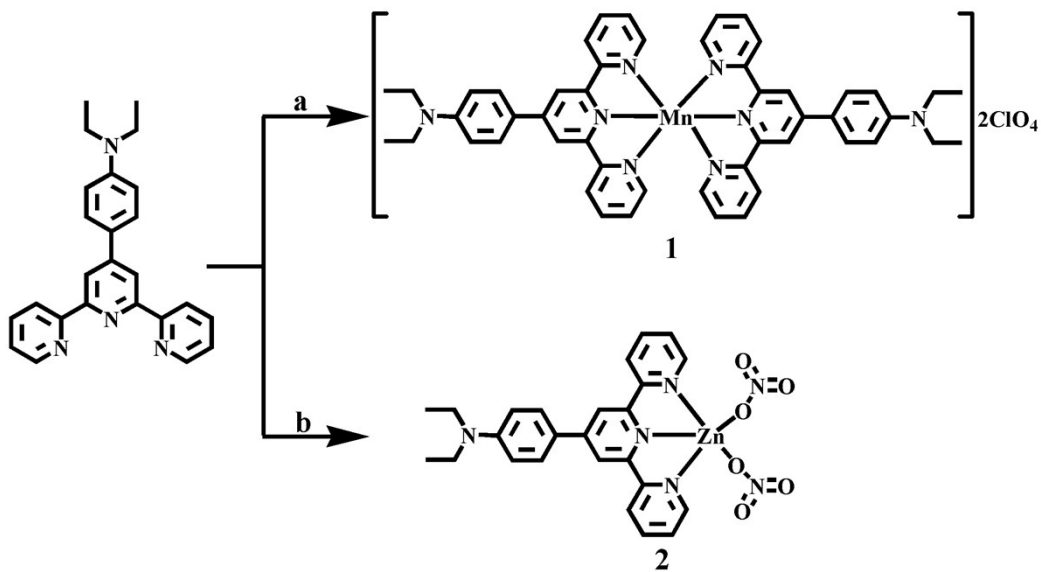

**Scheme S1.** Synthetic routes for complexes **1** and **2**. Reagents: (a)  $\text{Mn}(\text{ClO}_4)_2$ , methanol/ $\text{CHCl}_3$  (10:1), 80 °C; (b)  $\text{Zn}(\text{NO}_3)_2$ , methanol/ $\text{CHCl}_3$  (10:1), 80 °C.

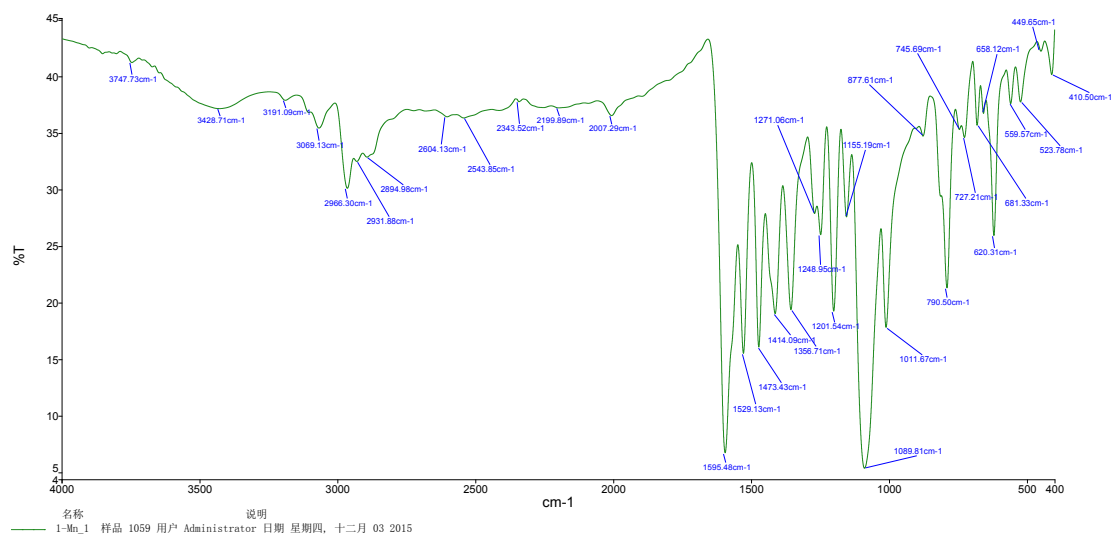

**Figure S1.** IR (KBr) spectra of complex **1**.

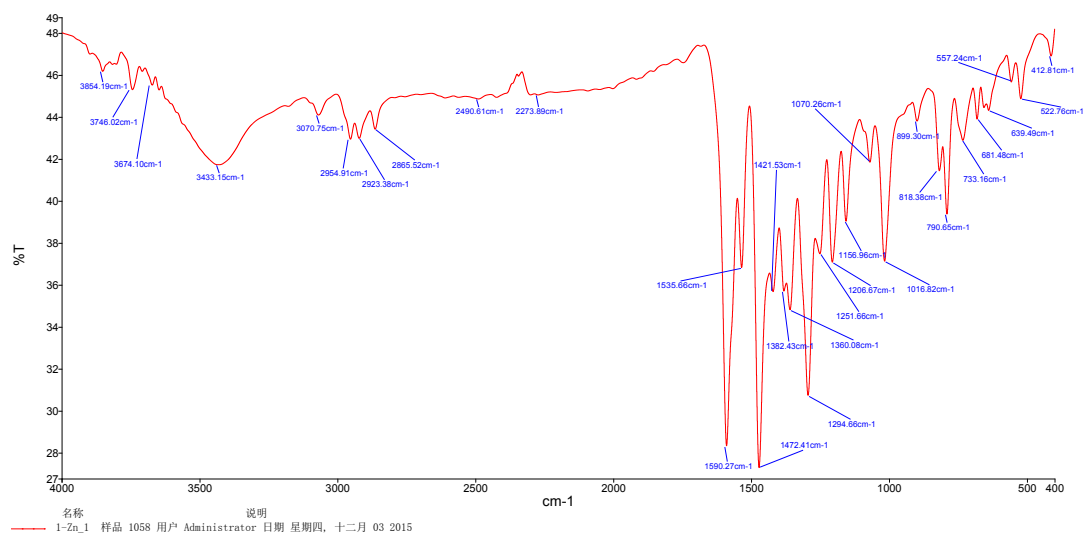

Figure S2. IR (KBr) spectra of complex 2.

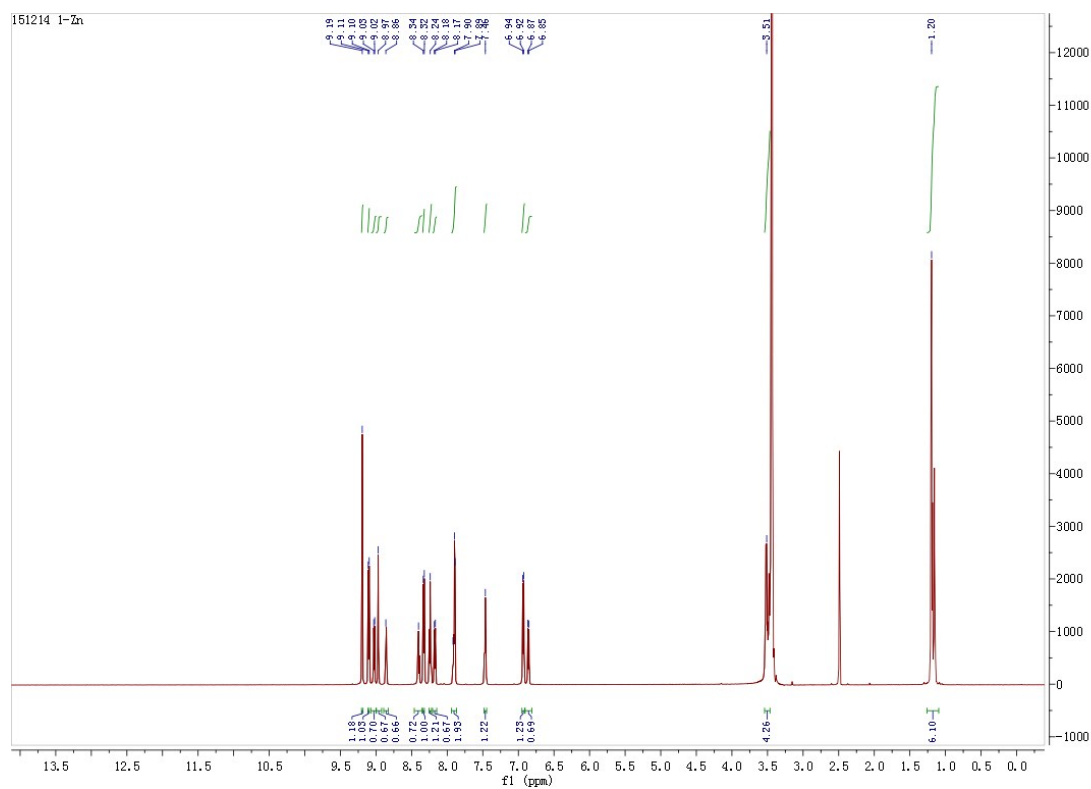

Figure S3.  $^1\text{H}$  NMR (600 MHz,  $\text{DMSO}-d_6$ ) for complex 2.

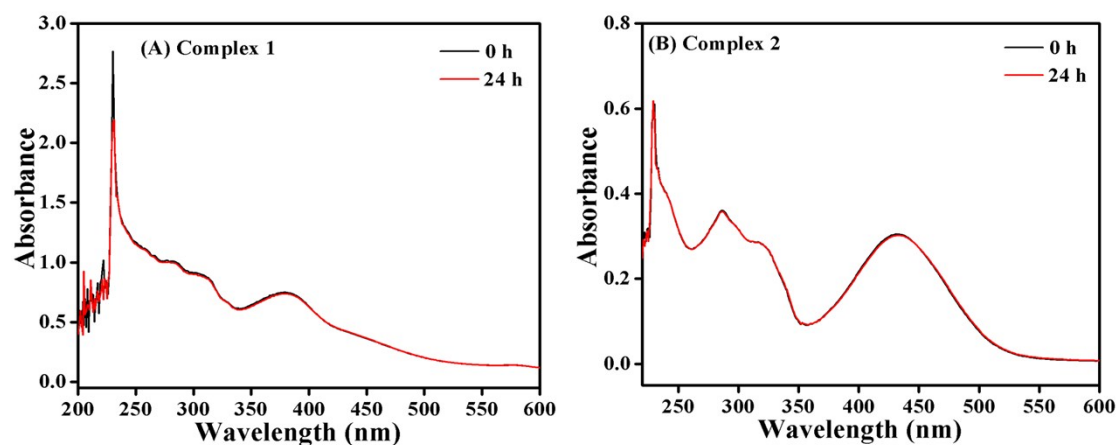

**Figure S4.** UV-Vis absorption spectra of complexes **1** and **2** ( $2.0 \times 10^{-5}$  M) in Tris-HCl solution in the time course 0, and 24 h, respectively.

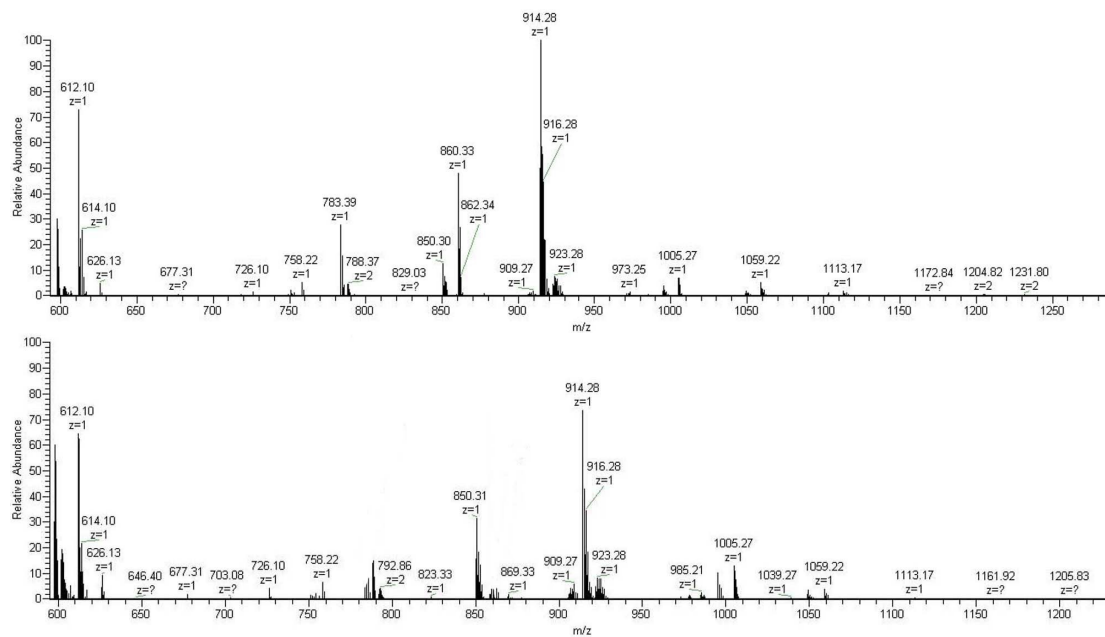

**Figure S5.** The mass spectra of complex **1** in Tris-HCl buffer solution (containing 5% DMSO) for 0 h (top) and 24 h (down), respectively.

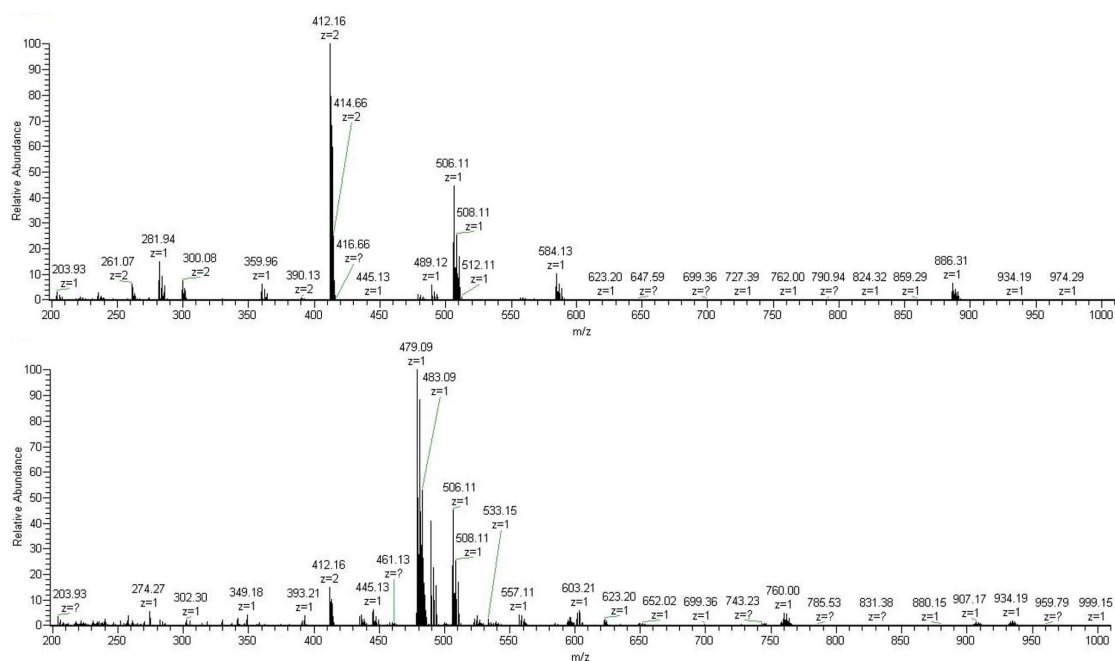

**Figure S6.** The mass spectra of complex **2** in Tris-HCl buffer solution (containing 5% DMSO) for 0 h (top) and 24 h (down), respectively.

## Experimental procedures

### 1. Organic synthesis

#### 1.1. Synthesis and characterization of 4-([2,2':6',2''-terpyridin]-4'-yl)-N,N-diethylaniline (**L**)

Synthesis of 4-([2,2':6',2''-terpyridin]-4'-yl)-N,N-diethylaniline (**L**) was performed as previously reported.<sup>2,3</sup> The yellow product of 4-([2,2':6',2''-terpyridin]-4'-yl)-N,N-diethylaniline was prepared in methanol/CHCl<sub>3</sub> (v/v=50:1) for spectroscopic characterizations and synthesis of the metallo-complexes. The chemical and physical properties of the newly synthesized product of **L** were consistent with those reported in our previous work.<sup>2</sup>

#### 1.2. Synthesis of [Mn(**L**)<sub>2</sub>]**·**2ClO<sub>4</sub> (**1**)

Mn(ClO<sub>4</sub>)<sub>2</sub> (0.1 mmol, 0.042 g), **L** (0.2 mmol), 1.0 mL methanol, 0.1 mL CHCl<sub>3</sub> were mixed a thick Pyrex tube (*ca.* 25 cm long). The tube was then placed in a liquid

N<sub>2</sub> bath to make the sample frozen. The solvent in the frozen sample was removed under vacuum while the tube was kept in the liquid N<sub>2</sub> bath. Afterwards, the tube was sealed and heated at 80 °C for three days. The resulting red brown crystals were used for spectroscopic characterizations. Yield: 0.0810 g, 80.0%. ESI-MS *m/z*: 914.28, [M-ClO<sub>4</sub>]<sup>+</sup>. IR (KBr, cm<sup>-1</sup>): 3748, 3429, 3191, 3069, 2966, 2932, 2895, 2007, 1595, 1529, 1473, 1414, 1357, 1271, 1249, 1202, 1155, 1090, 1012, 878, 791, 746, 727, 681, 658, 620, 560, 524, 450, 411. Elemental analysis: theoretical mass-percentage chemical composition for C<sub>50</sub>H<sub>48</sub>Cl<sub>2</sub>MnN<sub>8</sub>O<sub>8</sub>, C 59.18, H 4.77, N 11.04; experimental mass-percentage chemical composition, C 59.10, H 4.82, N 11.01.

### 1.3. Synthesis of [Zn(L)(NO<sub>3</sub>)<sub>2</sub>] (2)

Zn(L)(NO<sub>3</sub>)<sub>2</sub> (**2**) was prepared by mixing Zn(NO<sub>3</sub>)<sub>2</sub> (0.1 mmol), **L** (0.1 mmol), methanol (1.0 mL) and CHCl<sub>3</sub> (0.1 mL) in a thick Pyrex tube (*ca.* 25 cm long), followed by the same procedures as those described for the synthesis of [Mn(L)<sub>2</sub>]-2ClO<sub>4</sub> (**1**). Yield: 0.0528 g, 93.0%. <sup>1</sup>H NMR (600 MHz, DMSO-*d*<sub>6</sub>) δ: 9.19 (s, 1H), 9.10 (d, *J* = 8.1 Hz, 1H), 9.03 (d, *J* = 8.0 Hz, 1H), 8.97 (s, 1H), 8.86 (s, 1H), 8.40 (s, 1H), 8.33 (d, *J* = 8.8 Hz, 1H), 8.24 (s, 1H), 8.17 (d, *J* = 8.8 Hz, 1H), 7.90 (t, *J* = 8.8 Hz, 2H), 7.46 (s, 1H), 6.93 (d, *J* = 8.9 Hz, 1H), 6.86 (d, *J* = 8.9 Hz, 1H), 3.51 (s, 4H), 1.20 (s, 6H). ESI-MS *m/z*: 842.34, [2L+Zn]<sup>2+</sup>; 506.11, [L+Zn+NO<sub>3</sub>]<sup>+</sup>. IR (KBr, cm<sup>-1</sup>): 3854, 3746, 3674, 3433, 3071, 2955, 2923, 2866, 1590, 1536, 1472, 1422, 1382, 1360, 1295, 1252, 1207, 1157, 1070, 1017, 899, 818, 791, 733, 681, 639, 523, 413. Elemental analysis: theoretical mass-percentage chemical composition for C<sub>25</sub>H<sub>24</sub>N<sub>6</sub>O<sub>6</sub>Zn, C 52.69, H 4.24, N 14.75; experimental mass-percentage chemical composition, C 52.60, H 4.30, N 14.67.

## 2. X-Ray crystallography

The X-ray diffraction data collection of single crystals of complexes **1** and **2** were

performed on a SuperNova CCD area detector with graphite monochromated Mo-K $\alpha$  radiation ( $\lambda = 0.71073 \text{ \AA}$ ) at room temperature. The structures were determined using direct methods and refined using the SHELX-97 program.<sup>4,5</sup> The non-hydrogen atoms were located via successive difference Fourier synthesis. The final refinement was performed using the full-matrix least-squares method with anisotropic thermal parameters for non-hydrogen atoms on  $F^2$ . The hydrogen atoms were added theoretically on the concerned atoms. The parameters used in data collection and refinements are summarized in Tables S1–S2 together with the crystallographic data.

### 3. Materials, instruments, and other experimental methods

The materials, instruments, and experimental methods for the cytotoxicity assay, apoptosis analysis, cell cycle analysis, RNA extraction, reverse transcriptase–polymerase chain reaction (RT-PCR), western blot, and the transfection assay of complexes **1** and **2** were performed as reported previously.<sup>6–8</sup> The telomerase extract was prepared from the T-24 cells: a total of  $5 \times 10^6$  T-24 tumor cells untreated or treated with complexes **1** and **2** were pelleted, and the cells were washed with 5 mL of PBS, scraped and lysed for 30 min on ice. Finally, the lysate was centrifuged at 13 000 rpm for 30 min at 4 °C; the supernatant was collected and stored at  $-80 \text{ }^\circ\text{C}$  before use.<sup>6,9</sup> The TRAP assay was performed by following previously published procedures,<sup>10</sup> and the TRAP-silver staining assay of complexes **1** and **2** were performed as reported by Reed and co-workers.<sup>9,11</sup> Commonly, the IOD (integrated optical density) data of TRAP-silver staining assay were captured using Gel pro4.0, and the inhibitory rates of complexes **1** and **2** on telomerase could be described by the following:

$$\text{Inhibitory rates (\%)} = \frac{\text{IOD}_{\text{control group}} - \text{IOD}_{\text{treatment group}}}{\text{IOD}_{\text{control group}}} \times 100\%$$

### 4. Statistics



The statistical analysis including the Student's *t*-test was performed using SPSS 13.0.  $P \leq 0.05$  was treated as statistically significant.

## References

- 1 R. Cao, J.-L. Jia, X.-C. Ma, M. Zhou and H. Fei, *J. Med. Chem.*, 2013, **56**, 3636–3644.
- 2 H.-H. Zou, L. Wang, Z.-X. Long, Q.-P. Qin, Z.-K. Song, T. Xie, S.-H. Zhang, Y.-C. Liu, B. Lin and Z.-F. Chen, *Eur. J. Med. Chem.*, 2016, **108**, 1–12.
- 3 D.-L. Ma, C.-M. Che and S.-C. Yan, *J. Am. Chem. Soc.*, 2009, **131**, 1835–1846.
- 4 G. M. Sheldrick, SHELXTL-97, Program for refinement of crystal structures, University of Göttingen, Germany, 1997.
- 5 G. M. Sheldrick, SHELXS-97, Program for solution of crystal structures, University of Göttingen, Germany, 1997.
- 6 Z.-F. Chen, Q.-P. Qin, J.-L. Qin, Y.-C. Liu, K.-B. Huang, Y.-L. Li, T. Meng, G.-H. Zhang, Y. Peng, X.-J. Luo and H. Liang, *J. Med. Chem.*, 2015, **58**, 2159–2179.
- 7 Z.-F. Chen, Q.-P. Qin, J.-L. Qin, J. Zhou, Y.-L. Li, N. Li, Y.-C. Liu and H. Liang, *J. Med. Chem.*, 2015, **58**, 4771–4789.
- 8 Q.-P. Qin, Z.-F. Chen, W.-Y. Shen, Y.-H. Jiang, D. Cao, Y.-L. Li, Q.-M. Xu, Y.-C. Liu, K.-B. Huang and H. Liang, *Eur. J. Med. Chem.*, 2015, **89**, 77–87.
- 9 A. De Cian, G. Cristofari, P. Reichenbach, E. De Lemos, D. Monchaud, M.-P. Teulade-Fichou, K. Shin-ya, L. Lacroix, J. Lingner and J.-L. Mergny, *PNAS*, 2007, **104**, 17347–17352.
- 10 G. Krupp, K. Kühne, S. Tamm, W. Klapper, K. Heidorn, A. Rott and R. Parwaresch, *Nucleic Acids Res.*, 1997, **25**, 919–921.
- 11 J. E. Reed, A. A. Arnal, S. Neidle and R. Vilar, *J. Am. Chem. Soc.*, 2006, **128**, 5992–5993.
